# Supplementary material for: T cell progenitor therapy–facilitated thymopoiesis depends upon thymic input and continued thymic microenvironment interaction
Source: JCI journal article supplement (doi:10.1172/jci.insight.92056), 2017-05-17
Supplement: sd1 [file 1]

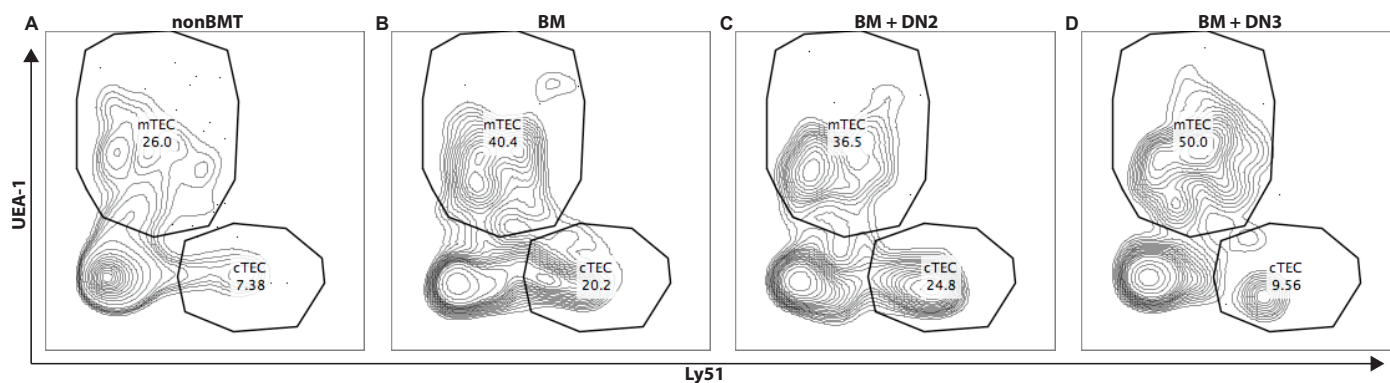

*Supplemental figure 1:* Lethally irradiated CD45.1 recipients were given CD45.2 WT BM alone, with DN2 Thy1.1 T cell progenitors (proT), or with double negative (DN) 3 Thy1.1 proT. Thymi were harvested at day 21 and their thymic epithelial cells (TECs) were analyzed by flow cytometry. Data are representative of 3 separate experiments with 3-6 animals per group per time point. Representative flow cytometry plots of CD45<sup>+</sup>MHCII<sup>+</sup>EpCAM<sup>+</sup> gated on mTEC (UEA-1<sup>hi</sup>Ly51<sup>lo</sup>) and cTEC (UEA-1<sup>lo</sup>Ly51<sup>hi</sup>) of nonBMT (A), BM only (B), BM + DN2 (C), and BM + DN3 (D) groups.

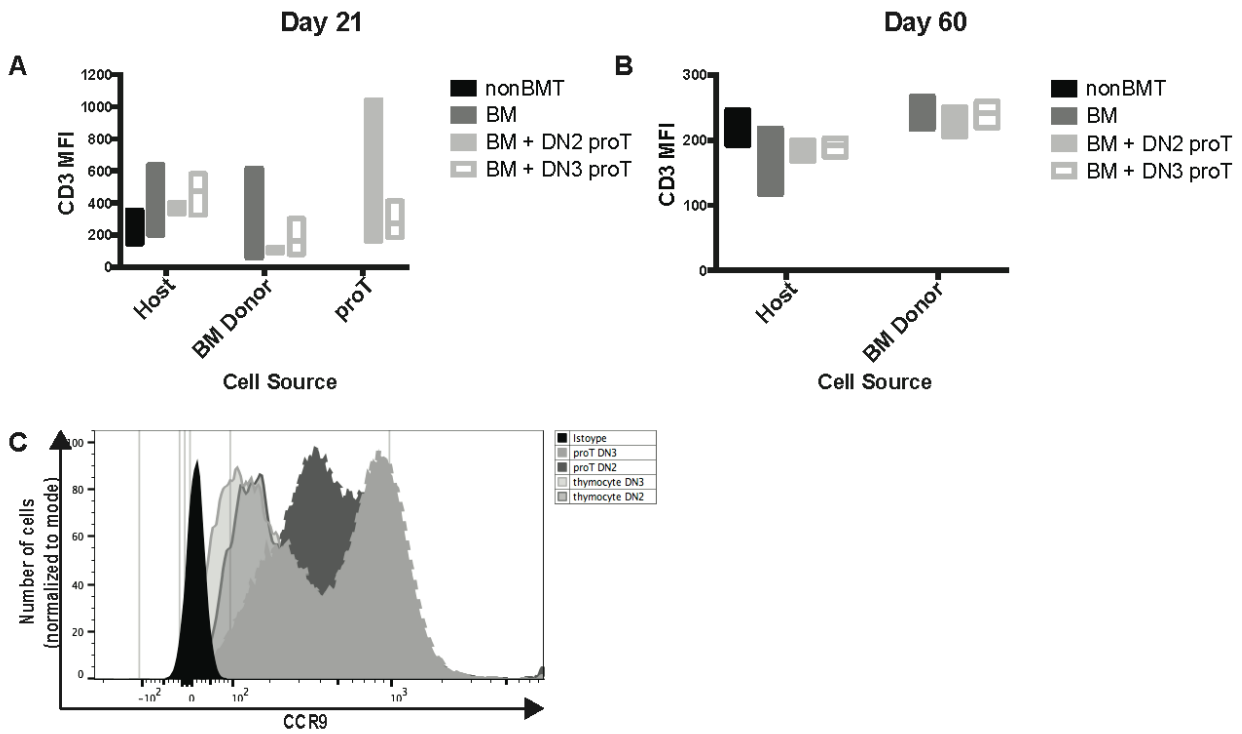

*Supplemental Figure 2:* Lethally irradiated CD45.1 B6 recipients were given CD45.2 WT BM alone, with double negative (DN) 2 Thy1.1 T cell progenitors (proT), or with DN3 Thy1.1 proT. Thymi and peripheral lymphoid organs were harvested at day 21 and day 60 and were analyzed by flow cytometry. Data are representative of three separate experiments with 4-6 mice per group per time point. Median fluorescent intensity of CD3 as measured at day 21 (A) and day 60 (B) expressed as boxes stretching from the minimum data point to the maximum data point. (C) Expression of CCR9 on DN2 and DN3 thymocytes (solid outlines) and DN2 and DN3 proT (dashed outlines).

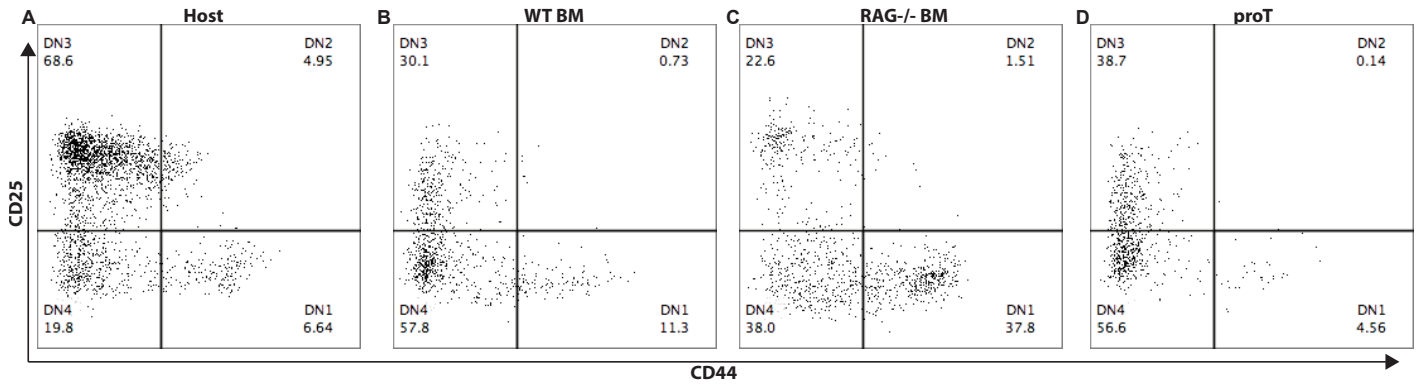

*Supplemental figure 3:* Lethally irradiated CD45.1 B6 recipients were given CD45.2 WT or *Rag*<sup>-/-</sup> BM with or without Thy1.1<sup>+</sup> T cell progenitors (proT). Thymi were harvested at the day 14 and their double negative T cell progenitors were analyzed by flow cytometry. Data are representative of two separate experiments with 3-5 animals per group. Representative flow cytometry plots of double negative cells of (A) host origin, (B) WT BM donor origin, (C) *Rag*<sup>-/-</sup> BM origin, and (D) proT origin.

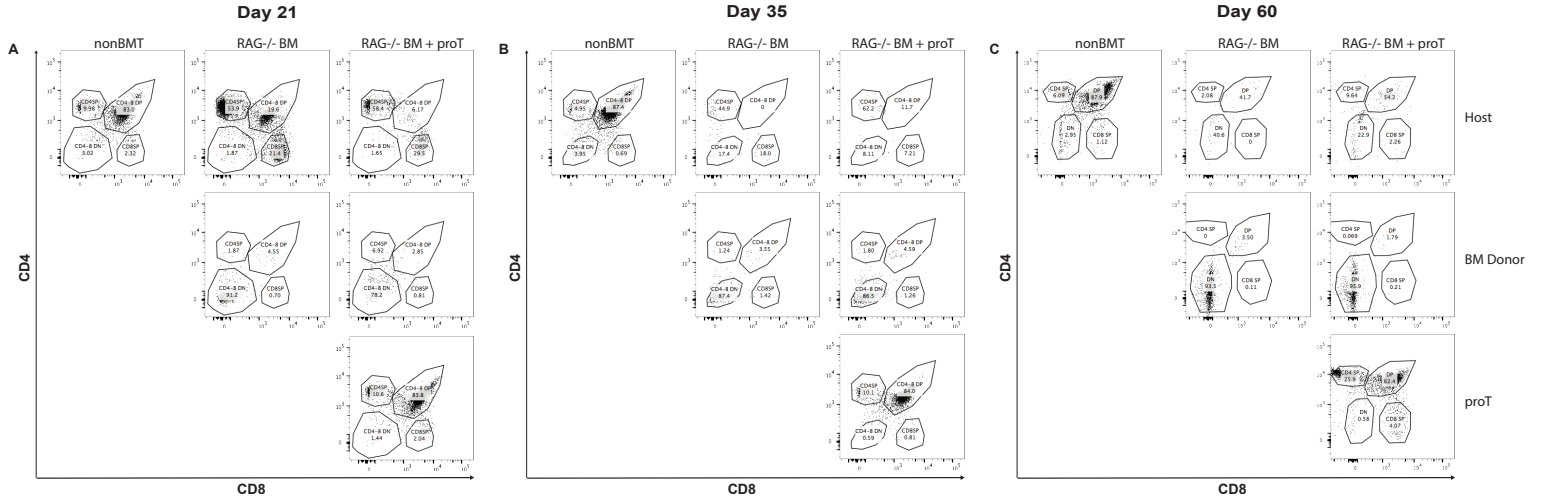

**Supplemental figure 4:** Lethally irradiated CD45.1 B6 recipients were given CD45.2 *Rag*<sup>-/-</sup> BM with or without Thy1.1 T cell progenitors (proT). Thymi were harvested at the indicated time points and analyzed by flow cytometry. Data are representative of three separate experiments with 3-5 animals per group per time point. Representative flow cytometry plots are shown of thymic T cells of host, BM donor, and proT origin at day 21 (A), day 35 (B), and day 60 (C) after transplant.
